1  
2  
3  
4  
5  
6  
7  
8  
9  
10  
11  
12  
13  
14  
15  
16  
17  
18  
19  
20  
21  
22  
23

LRH. Ripperger *et al.*

RRH: Figs attract Bat Dispersers by Scent

**Two dispersers are better than one: a ‘bird-fig’ attracts bats via nocturnal scent**

Simon P. Ripperger<sup>a,b,\*</sup>, Saskia Rehse<sup>a,#</sup>, Stefanie Wacker<sup>a</sup>, Elisabeth K. V. Kalko<sup>a,c</sup>, Stefan Schulz<sup>d</sup>, Bernal Rodriguez-Herrera<sup>e</sup>, Manfred Ayasse<sup>a</sup>

<sup>a</sup>Institute of Evolutionary Ecology and Conservation Genomics, University of Ulm, Helmholtzstr. 10-1, Containerstadt, 89081 Ulm, Germany

<sup>b</sup>Museum für Naturkunde, Leibniz-Institut für Evolutions- und Biodiversitätsforschung, Invalidenstraße 43, 10115 Berlin, Germany

<sup>c</sup>Smithsonian Tropical Research Institute, P.O. Box 0843-03092, Balboa, Panama

<sup>d</sup>Institute of Organic Chemistry, Technische Universität Carolo-Wilhelmina zu Braunschweig, Hagenring 30, 38106 Braunschweig, Germany

<sup>e</sup>Escuela de Biología, Universidad de Costa Rica, P.O. Box 11501-2060, San Pedro, Costa Rica

<sup>#</sup>current address: Leibniz-Institut für Gewässerökologie und Binnenfischerei Müggelseedamm 310, 12587 Berlin, Germany

\*corresponding author, E-mail: [simon.ripperger@mfn-berlin.de](mailto:simon.ripperger@mfn-berlin.de), phone: ++49 (0)30 2093 8468, fax: ++49 (0)30 2093 8565

Received \_\_\_\_; revision accepted \_\_\_\_

24 **Abstract**

25 The plant genus *Ficus* is a keystone resource in tropical ecosystems. One of the unique features of  
26 this group is the modification of fruit traits in concert with various dispersers, the so-called fruit  
27 syndromes. The classic example of this is the strong phenotypic differences found between figs  
28 with bat and bird dispersers (color, size, and presentation). The ‘bird-fig’ *Ficus colubrinae*  
29 represents an exception to this trend since it attracts the small frugivorous bat species *Ectophylla*  
30 *alba* at night, but during the day attracts bird visitors. Here we investigate the mechanism by  
31 which this ‘bird-fig’ attracts bats despite its morphology which should appeal solely to birds. We  
32 performed feeding experiments with *Ectophylla alba* to assess the role of fruit scent in the  
33 detection of ripe fruits. *Ectophylla alba* was capable of finding ripe figs by scent alone under  
34 exclusion of other natural sensory cues. This suggests that scent is the key signal in the  
35 communication between *Ectophylla alba* and *Ficus colubrinae*. Analyses of odor bouquets from  
36 the bat- and bird-dispersal phases (i.e. day and night) differed significantly in their composition  
37 of volatiles. This indicates that an olfactory signal allows a phenotypically classic ‘bird-fig’ to  
38 attract bat dispersers at night thus to maximizing dispersal.

39 **Key words**

40 *Ficus colubrinae*; *Ectophylla alba*; seed dispersal syndromes; sensory cues; fruit volatiles; diel  
41 differences; neotropics

42

43 FRUITING PLANTS NEED TO ENSURE THAT THEIR SEEDS ARE TRANSPORTED AWAY FROM THEIR POINT  
44 of origin in order to increase survival probability by avoiding competition and reaching  
45 advantageous environments for germination (Howe & Smallwood 1982). Common ways of seed  
46 dispersal include self-dispersal by explosive fruits, dispersal by wind or the production of fleshy  
47 fruits to promote dispersal by animals (Willson & Travaset 2000). Animal dispersal, or zoochory,  
48 frequently consists of a mutualistic relationship between plants and animals where animals are  
49 rewarded with edible, fleshy fruit parts for their service of transporting seeds away from the  
50 parental plant (Herrera 2002).

51         Bats and birds are very important vertebrate seed dispersers in tropical ecosystems  
52 (Galindo-González *et al.* 2000, Fleming & Kress 2013). Fruits, however, that are consumed by  
53 either bats or birds may vary strongly in their appearance as a consequence of the contrasting life  
54 histories of the associated dispersers (Hodgkison *et al.* 2013). Diurnal birds mainly rely on vision  
55 while foraging and hence prefer conspicuous fruits that contrast with the foliage (Gautier-Hion *et*  
56 *al.* 1985, Wheelwright & Janson 1985, Burns & Dalen 2002). On the contrary, bat fruits are  
57 frequently cryptic green and produce strong odors to attract their nocturnal dispersers (Thies *et al.*  
58 1998, Korine *et al.* 2000, Korine & Kalko 2005). Additionally, bat dispersed plants present fruits  
59 on erect spikes or pendulous structures in order to facilitate close distance detection by  
60 echolocation (Kalko & Condon 1998, Thies *et al.* 1998). While bats are able to consume larger  
61 fruits piecemeal by using their teeth, fruit size may be challenging to birds since they are limited  
62 by gape width (Wheelwright 1985, Lomáscolo *et al.* 2008).

63         Such different requirements of disperser groups drove the development of so-called  
64 dispersal syndromes, trait combinations that show a correlated evolution (van der Pijl  
65 1982, Janson 1983, Howe & Westley 1988). The existence of dispersal syndromes has been  
66 discussed for a long time and was confirmed by a comprehensive study of the plant genus *Ficus*

67 (Lomáscolo *et al.* 2008,Lomáscolo *et al.* 2010) a keystone resource for many tropical frugivores  
68 including bats and birds (Korine *et al.* 2000,Shanahan *et al.* 2001). In detail, bird dispersed figs or  
69 ‘bird-figs’ from both New and Old World tropics tend to be smaller, stronger contrasting to the  
70 foliage, less odorous, and arise from branches. On the contrary, figs dispersed mainly by bats or  
71 ‘bat-figs’ are larger, more cryptic relative to the foliage, have an aromatic scent, and are  
72 frequently presented on the trunk (Hodgkison *et al.* 2007,Hodgkison *et al.* 2013).

73         However, not all species of the genus *Ficus* are clearly classifiable as ‘bat- or bird-figs’.  
74 Intermediate phenotype combinations exist and are frequently associated with dispersal by both  
75 bats and birds (Lomáscolo *et al.* 2010). Trait expression may even vary temporally. The  
76 Paleotropical fig species, *Ficus benghalensis*, has been shown to produce significantly different  
77 odor bouquets during day and night, probably in order to attract nocturnally foraging bats by  
78 scent, while diurnal birds are attracted by visual cues (Borges *et al.* 2011). Unfortunately, the  
79 appeal of the altered scent on the nightly dispersers has not been studied in experimental setups.  
80 The importance of olfaction for fruit detection in bats has been demonstrated in feeding trials for  
81 several frugivorous species of the Neotropical bat family Phyllostomidae (Thies *et al.*  
82 1998,Korine & Kalko 2005,Hodgkison *et al.* 2013). These studies show that the examined bat  
83 species are able to localize fruits by either olfaction alone or in combination with echolocation.  
84 This dominant role of olfaction in the foraging behavior of frugivorous bats may enable plants  
85 that phenotypically match the bird-dispersal syndrome to expand seed dispersal into the night by  
86 nocturnal production of volatiles that attract bats or other nocturnal mammals.

87         The Mesoamerican fig species *Ficus colubrinae* is an excellent study organism to  
88 investigate the mechanisms of attracting nightly dispersers despite heavy bird visits during day.  
89 The phenotype of *F. colubrinae* clearly matches the bird-dispersal syndrome with very small  
90 fruits which are bright red colored when ripe and presented on the branches (Burger

91 1977, Galindo-González *et al.* 2000). While birds extensively visit these fig trees during day, the  
92 small phyllostomid bat *Ectophylla alba* feeds heavily on fruits of *F. colubrinae* at night (Brooke  
93 1990). In the present study we assess the role of fruit odor in the attraction of *E. alba* to ripe fruits  
94 of *F. colubrinae*. In detail we test the following hypotheses: (1) olfaction plays a major role for  
95 the detection of ripe fruits in *Ectophylla alba*; (2) odor bouquets of fruits change when the fruits  
96 ripen and vary among day and night in ripe fruits, and (3) ripe fruits will shift production and  
97 release of volatiles during night in favor of substances that are known from published studies to  
98 be dominant in ‘bat-figs’. In order to test these hypotheses we combine semi-natural behavioral  
99 experiments with wild bats and chemical analyses of fig scent.

100

## 101 **METHODS**

102

103 **STUDY SITE**—Our study was conducted at „La Tirimbina Rainforest Center“ (TRC) in the  
104 province Heredia in Costa Rica (10°26’ N, 83°59’ W). The study site is located in the Caribbean  
105 lowlands of Costa Rica. Annual precipitation averages at 3900 mm. Behavioral experiments were  
106 performed during May and June 2010 and sampling of fig scent from February to May 2011.

107 **STUDY ORGANISMS**—*Ficus colubrinae* (Moraceae) is a Neotropical fig species. Its fruiting  
108 phenology is characterized by asynchronous fruit crop production of small fruits (diameter < 0.8  
109 mm, mass 0.3 g) that are presented on the branches and turn dark red while ripening (Burger  
110 1977, Korine *et al.* 2000). On Barro Colorado Island in central Panama *F. colubrinae* draws little  
111 attention of frugivorous bats and is hence considered to be mainly bird-dispersed (Kalko *et al.*  
112 1996, Korine *et al.* 2000). However, farther north where *F. colubrinae* occurs in sympatry with  
113 *Ectophylla alba* this particular bat species shows a dietary specialization on *F. colubrinae*  
114 (Brooke 1990).

115 STUDY ANIMAL—*Ectophylla alba* is a small-bodied leaf-nosed bat species (Phyllostomidae) that  
116 is distributed from northern Honduras to north-eastern Panama (Rodriguez-Herrera *et al.* 2008).  
117 It modifies leaves, predominantly of plants of the genus *Heliconia*, to construct shelters where it  
118 roosts in social groups of typically four to eight individuals (Brooke 1990).

119 BEHAVIORAL EXPERIMENTS—We captured groups of *Ectophylla alba* from roosts in *Heliconia*  
120 leaves in the area of TRC and selected single males for the feeding experiments in order to  
121 prevent lactating or pregnant females or juveniles from isolation of the social group. All  
122 individuals that were not considered for further experiments were set free immediately in close  
123 proximity to the roost. Following the capture, a single male was released into a flight tent  
124 (Eureka; ground area 4 x 4m, height 2.5m) several hours before sunset. At nightfall we installed a  
125 freshly cut branch of *Ficus colubrinae* that yielded a range of fruits of different stages of maturity  
126 into the flight tent. In order to adjust to the foraging situation we allowed the bat to feed on ripe  
127 fruits. After the consumption of five fruits we started choice trials in order to test whether *E. alba*  
128 relies mainly on olfaction or echolocation/vision for the short-range localization of ripe fruits. On  
129 one side of the branch we presented a strong olfactory cue to the bat that lacked visual or echo-  
130 acoustic properties of natural figs, i.e. we presented a tissue bag that was filled with ten ripe figs  
131 (similar methods have been used to test for the response of bats to olfactory cues in absence of  
132 natural fruit shape or surface structure: Kalko and Condon (1998) presented cotton saturated with  
133 juice of cucurbit fruits to bats; Hodgkison *et al.* (2007) wrapped ripe figs in several layers of  
134 nylon stockings). Simultaneously we presented on the other side of the branch fig models made  
135 from red clay that were similar to natural *F. colubrinae* fruits in terms of form, color, and fruit  
136 presentation (in branch forks). We rated *E. alba*'s behavior as a positive response to the presented  
137 object when repeated approximation flights to or a landing next to the object followed by a  
138 directed movement to it occurred. In total, we tested six individual bats. Every bat was tested

139 only once in order to avoid bias caused by learning effects. It was not possible to record data  
140 blind because our study involved focal animals. We documented bat behavior using an infrared  
141 camera (Sony Night-Shot DCR-HC42E, Sony, Japan) that was connected to a video recorder  
142 (GV-D 900E, Sony, Japan). We stored recordings on MiniDV video tapes (DVM60PR3, Sony,  
143 Japan).

144 SAMPLING OF FIG SCENT—We sampled volatiles of *Ficus colubrinae* fruits based on dynamic  
145 headspace adsorption techniques (Hodgkison *et al.* 2007, Kalko & Ayasse 2009, Hodgkison *et al.*  
146 2013). Three categories of fruits were sampled: (1) unripe during night, (2) ripe during day, and  
147 (3) ripe during night. Single fruits were collected from five individual fig trees and placed in  
148 glass chambers. Four glass chambers were connected to a single battery operated membrane  
149 pump. Every individual glass chamber was connected via a Teflon tube to an adsorbent tube  
150 containing activated charcoal (activated charcoal, Supelco, Orbo 32 large) that was installed  
151 upstream in order to filter-clean the pulled atmospheric air. After passing the glass chamber  
152 containing the fruit, the air exit through a glass sampling cartridge packed with 5mg Super Q  
153 (Waters Division of Millipore) in order to collect volatiles. The sampling cartridges were twice y-  
154 connected to the pump via silicone tubing. Two such setups were run simultaneously allowing for  
155 the collection of seven samples at a time along with one blank control that consisted of an empty  
156 glass chamber. Each sampling session was started at 2000 h for nightly sampling, or 0800 h for  
157 daily sampling, respectively, and lasted for eight hours with a flow rate of ca. 100mL min<sup>-1</sup>.  
158 After sampling, all sorbent tubes were eluted with 0.050 ml of 10:1 pentane/acetone. Eluted  
159 samples were sealed in small airtight borosilicate glass specimen tubes and stored in the freezer at  
160 -18°C. After each sampling session, all glassware was thoroughly cleaned three times with  
161 ethanol (Absolute Alcohol, Hayman Ltd., Essex, UK), acetone (LiChrosolv, Merck, Darmstadt,  
162 Germany), and pentane (SupraSolv, Merck). Sorbent tubes were cleaned three times with ethanol,

163 dichloromethane (LiChrosolv, Merck), and pentane, and then wrapped in aluminum foil and  
164 stored for future use in airtight glass jars with Teflon-coated lids.

165 CHEMICAL ANALYSES OF COMPOUNDS: GC-RUNS, QUANTIFICATION & MS-ANALYSES—For  
166 quantitative analyses, 0.1 µg of octadecane was added as an internal standard to each of the eluted  
167 fruit odor samples collected by dynamic headspace adsorption (see above). All samples were  
168 analyzed with an HP5890 Series II gas chromatograph (Hewlett-Packard, Palo Alto, CA, USA),  
169 equipped with a DB5 capillary column (30 m × 0.25 mm i.d.) that used hydrogen as the carrier  
170 gas (2 ml min<sup>-1</sup> constant flow). One microliter of each sample was injected splitless at 40°C.  
171 After 1 min, the split valve was opened and the temperature increased by 4°C min<sup>-1</sup> until  
172 reaching a temperature of 300°C. GC/MS analyses were carried out on an HP 6890 Series GC  
173 connected to an HP 5973 mass selective detector (Hewlett-Packard) fitted with a BPX5 fused-  
174 silica column (25 m, 0.22 mm i.d., 0.25 µm film thick, SGE). Mass spectra (70 eV) were  
175 recorded in full scan mode. Retention indices were calculated from a homolog series of n-  
176 alkanes. Structural assignments were based on comparison of analytical data obtained with  
177 natural products and data reported in the literature (McLafferty & Stauffer 1989, Hodgkison *et al.*  
178 2007, Hodgkison *et al.* 2013), and those of synthetic reference compounds. Structures of  
179 candidate compounds were verified by co-injection.

180 STATISTICAL ANALYSES—We performed principal component analysis (PCA) on the relative  
181 amounts of fruit scent compounds using SPSS 17. We used the resulting principal components  
182 (PCs) with an eigenvalue above one to run a discriminant function analysis (DFA) in order to test  
183 for differences in the scent composition between (1) unripe fruits during night, (2) ripe fruits  
184 during day, and (3) ripe fruits during night. We used the factor loadings after varimax rotation  
185 and the standardized discriminant function coefficients to assess the importance of individual  
186 compounds. Factor loading above 0.5 were considered high. Finally, we compared relative



187 amounts of single compounds of ripe fruits during day and night (groups 2 and 3) using Mann-  
188 Whitney U-tests in R 2.15.3 (R Developing Core Team 2015).

189

## 190 **RESULTS**

191

192 ACCUSTOMING PHASE IN THE FLIGHT TENT AND EXPERIMENTAL TRIALS—After releasing captured  
193 bats into the flight tent, the bats performed circular inspection flights for several minutes before  
194 they roosted in a corner of the flight tent until dusk. Shortly before dusk we installed a natural  
195 branch of *F. colubrinae* with several ripe and unripe fruits. All six bat individuals performed  
196 search flights that lasted between less than one minute and almost two hours (mean  $\pm$  standard  
197 deviation:  $32 \pm 43$  minutes,  $n = 6$ ) until the bats approached the branch for the first time. Then the  
198 bats conducted two to nine approximation flight towards the branch over a period of one to 91  
199 minutes (mean  $\pm$  standard deviation:  $19 \pm 36$  minutes,  $n = 6$ ) before they landed and consumed a  
200 fig either directly on the branch or on the wall of the tent.

201         After the consumption of five ripe figs we started the behavioral experiments by  
202 presenting to the bat red modelling clay fig dummies on a natural branch of *F. colubrinae* and a  
203 tissue bag filled with 10 ripe *F. colubrinae* figs. None of the tested bats showed a clear positive  
204 response to the modelling clay figs. We did neither observe repeated approximation flights nor  
205 landing in the proximity of the models which represented an echo-acoustic/visual cue similar to  
206 natural figs (a red, similar sized sphere presented in branch forks). On the contrary, five out of six  
207 individuals responded to the bag filled with ripe figs representing a strong olfactory cue. After a  
208 period of six to 48 minutes (mean  $\pm$  standard deviation:  $16 \pm 21$  minutes,  $n = 5$ , see Table 1) and  
209 one to five approaches the bats either landed on or right next to the bag or landed more than 5 cm

210 away and move hand over hand along the branch towards the bag. Subsequently the bats bit open  
211 the bag and consumed a fig.

212 COMPARISON OF ODOR BOUQUETS—In the chemical analyses we registered 14 distinct peaks that  
213 were attributed to 17 individual substances, again 13 of which were unambiguously identified by  
214 mass spectrometry (Table 2). Nonanal and 1-tetradecanol contributed the largest share to the  
215 overall bouquet (Fig. 1, Table S1). Three further substances could be assigned to substance  
216 classes, however, so far not identified and one substance could not be classified. The identified  
217 substances belonged to different compound classes: aliphatic compounds derived from the fatty  
218 acid biosynthetic pathway (here shortly named fatty acid pathway compounds, FAPCs),  
219 sesquiterpenes, and aromatic compounds. In three cases, two substances contributed to a single  
220 peak in the GC-analysis. In those cases the overlapping substances were represented by a single  
221 value for the following analyses. Two of the identified substances, indene and anthracene, have a  
222 main relevance in industrial applications and were therefore excluded from all further analyses.  
223 They were considered environmental pollutants that accumulated on the outside of the fruits over  
224 time since our field site was closely located to human structures including infrastructure and  
225 industry. There were no significant differences in relative amounts of indene and anthracene  
226 among day and night in ripe fruits. Medians were lowest in unripe fruits and rising over time  
227 while ripening (Fig. S1 & Fig. S2).

228 We performed a PCA that included 12 individual values for the relative amounts of the  
229 remaining 15 chemical compounds from the three tested groups of figs ((1) unripe fruits at night,  
230 (2) ripe fruits during day, and (3) ripe fruits during night). Four PCs with an eigenvalue above  
231 one accounted for 76.2 % of the total variation. The DFA that used the four PCs as variables  
232 resulted in two discriminant functions (DFs) and showed significant differences between the  
233 tested groups (function 1:  $\chi^2 = 78.9$ ,  $df = 8$ ,  $p < 0.001$ ; function 2:  $\chi^2 = 24.9$ ,  $df = 3$ ,  $p < 0.001$ ;

234 Fig. 2). The highest coefficient for DF 1 was attributed to PC2 which in turn had high factor  
235 scores on the sesquiterpenes  $\alpha$ -copaene and  $\delta$ -cadinene + calamenene (Table S2 & Table S3). For  
236 DF 2, PC1 and PC3 had the highest coefficients. PC1 had high factor loading on sesquiterpene A,  
237  $\beta$ -copaene + naphthalene derivative,  $\alpha$ -cubebene + 1,1'-biphenyl and the FAPCs nonanal and  
238 decanal. 1-dodecanol and 1-tetradecanol loaded high on PC3. Seventy-five percent of the original  
239 grouped cases were correctly classified (72.5 % of cross-validated grouped cases).

240 DAILY DIFFERENCES OF SINGLE COMPOUNDS IN RIPE FRUITS—All scent compounds analyzed were  
241 present in diurnal and nocturnal scents. In general, fatty acid pathway compounds dominated both  
242 diurnal and nocturnal scents (Fig. 1). However, relative amounts of sesquiterpene compounds  
243 increased at night and FAPCs decreased, except the two long-chain alcohols (Table 2). Six out of  
244 twelve day/night comparisons of relative amounts of single scent components showed significant  
245 differences. The aldehydes nonanal and decanal and one unclassified substance accounted for a  
246 significant greater share during day, while three sesquiterpene compounds in combination with  
247 aromatic compounds (sesquiterpene A,  $\beta$ -copaene + naphthalene derivative,  $\alpha$ -cubebene + 1.1-  
248 biphenyl) had significantly higher proportions during night (Table 2).

249

## 250 **DISCUSSION**

251

252 Our study shows that scent is an important signal in the communication between *Ectophylla alba*  
253 and *Ficus colubrinae*. *Ectophylla alba* was capable during experimental trials to find ripe figs by  
254 scent alone under exclusion of other natural sensory cues. Odor bouquets of figs undergo  
255 significant changes with regard to the relative amounts of compounds during the process of  
256 maturation and bouquets of ripe figs differ significantly in the composition of volatiles during  
257 day and night. Nightly changes in scent composition show a pattern that contrasts with other 'bat-

258 figs'. We suggest that this strategy of *Ficus colubrinae* is an adaptation towards dispersal by  
259 small bats such as *Ectophylla alba* rather than towards bat dispersal in general, since odor may be  
260 an ideal signal to attract a specific group of bat species.

261         Semi-natural feeding trials showed that phyllostomid bats locate fruits by echolocation  
262 (Kalko & Condon 1998) or olfaction (Thies *et al.* 1998, Korine & Kalko 2005, Hodgkison *et al.*  
263 2013) as the primary sensory cues. Our results from the feeding experiments show that *E. alba*  
264 conforms to the latter foraging strategy. The tested bats only showed strong responses to the  
265 tissue bag that gave a strong olfactory cue but lacked natural texture, shape, size, or presentation  
266 of figs that might be of importance for detection by echolocation. Therefore, we assume that  
267 echolocation may not play such a dominant role for *E. alba* in fruit detection as it does for other  
268 bat species. The Neotropical bat *Phyllostomus hastatus* feeds on fruits of a Cucurbitaceae that are  
269 borne on pendulous structures (Kalko & Condon 1998). This style of fruit presentation facilitates  
270 detection by echolocating bats because the fruit represents a clutter free target. In general,  
271 flagellichory or cauliflory (pendulous or trunk-borne presentation of fruits that reduce the  
272 presence of foliage close to the fruit) are widespread adaptations of plants to chiropterochory  
273 (Van der Pijl 1957). Korine and Kalko (2005) argue that detection of fruits by downwards  
274 frequency modulated signals which are typical for phyllostomid bats is possible but largely  
275 depends on the fruit presentation and the complexity of the surrounding clutter. However, *F.*  
276 *colubrinae* presents its fruits sessile, usually paired at the node (Burger 1977), thus in a highly  
277 cluttered environment making detection by echolocation difficult. Hence, we conclude that based  
278 on *F. colubrinae*'s way of fruit presentation only olfaction qualifies as primary cue for detecting  
279 figs, at least until *E. alba* gets very close to the figs.

280         Olfactory cues enable plants to signal the readiness of fruits for dispersal. Accordingly,  
281 temporal changes in the volatile profile of fruits are common during the process of ripening (e.g.

282 (Lalel *et al.* 2003, Obenland *et al.* 2012, Li *et al.* 2013)) and have also been documented for wild,  
283 bat-dispersed fig species (Hodgkison *et al.* 2007). Our data is consistent with a change in the  
284 overall composition of the scent bouquet during the process of ripening. Additionally we  
285 observed significant changes among day and night, caused by day-time specific scent production.  
286 Circadian changes in the volatile profile of fruits seem to be a much rarer phenomenon. To our  
287 knowledge, only Borges *et al.* (2011) observed diel differences in the volatile signal in Old World  
288 figs of the species *F. benghalensis*. These fruits are consumed by birds during the day and by bats  
289 during the night. Dispersal by both, birds and bats, is not uncommon within the genus *Ficus*, yet  
290 this dispersal mode usually concurs with fruit phenotypes that are considered intermediate  
291 between the bird and the bat syndrome (Lomáscolo *et al.* 2010). While most fruit traits in *F.*  
292 *colubrinae* match the bird-syndrome, scent alone is sufficient for *Ectophylla alba* to detect the  
293 ripe fruits as shown by our behavioral experiments. Hence, a nightly shift in volatile production  
294 may enable ‘bird-figs’ to additionally attract certain bat species as dispersers and hence allow for  
295 dispersal during the daytime and at nighttime. To achieve seed dispersal by distinct animal taxa  
296 may result in multiple benefits to a reproducing plant. The contribution to overall seed rain by  
297 birds or bats, respectively, may vary quantitatively across seasons (Galindo-González *et al.*  
298 2000). Microhabitat deposition also strongly depends on the disperser since birds tend to  
299 disseminate seeds when perched while bats usually defecate seeds during flight. The resulting  
300 seed rain can be dominated by chiropterochorously dispersed seeds at forest edges and open  
301 areas, while most ornithochorous seeds reach forest sites (Charles-Dominique 1986, Gorchov *et*  
302 *al.* 1993). An all-season reproducing plant species like *F. colubrinae* that may develop both,  
303 epiphytic and solitary life forms (Burger 1977), may in particular benefit from the attraction of  
304 both bats and birds. This way the plant may maximize dispersal rates of the year-round produced  
305 fruits and seeds may arrive in a more heterogeneous range of microhabitats for germination.

306 All unambiguously identified compounds except 1-dodecanol, 1-tetradecanol, and calamenene  
307 have been documented to be produced by *Ficus* spp., either by floral stages (Grison-Pigé *et al.*  
308 (2002):  $\alpha$ -cubebene,  $\alpha$ -,  $\beta$ -copaene,  $\beta$ -selinene,  $\delta$ -cadinene, decanal) or by fruits (Hodgkison *et al.*  
309 (2013):  $\alpha$ -,  $\beta$ -copaene,  $\delta$ -cadinene; Borges *et al.* (2011): nonanal, decanal,  $\alpha$ -copaene,  $\delta$ -  
310 cadinene). The scent bouquet of *F. colubrinae* fruits, which was dominated by fatty acid pathway  
311 compounds, was more similar to ‘bat-figs’ from the Old World tropics (Hodgkison *et al.*  
312 2007, Borges *et al.* 2008, Borges *et al.* 2011) than to Neotropical bat-dispersed fig species that  
313 were characterized by high proportions of monoterpenes (Hodgkison *et al.* 2013). Monoterpenes  
314 were completely missing in our samples. This result was surprising since feeding trials showed  
315 that fruit scents, which were dominated by monoterpenes were highly attractive to the  
316 phyllostomid bat *Artibeus jamaicensis* (Hodgkison *et al.* 2013). Instead, in our samples  
317 sesquiterpenes increased throughout and in parts significantly during night, while fruit scents that  
318 were dominated by sesquiterpenes were rejected by *A. jamaicensis*. The day-round changes in the  
319 scent production of the Paleotropical *F. benghalensis*, were also in contrast to our observations,  
320 despite similarities in the overall bouquet. In *F. benghalensis* relative amounts of fatty acid  
321 pathway compounds significantly increased during the nocturnal bat-dispersal phase and  
322 sesquiterpenes contributed significantly higher proportions during day (Borges *et al.* 2011). The  
323 reverse pattern we observed indicates that certain sesquiterpenes may play an important role in  
324 the attraction of *E. alba*. Paleotropical bats and even larger-bodied Neotropical species, however,  
325 go for different substance groups.

326 Those fundamental differences observed among figs that attract bats point towards  
327 different olfactory preferences in bats that have different diets, as it was already proposed by  
328 Hodgkison *et al.* (2013). Kalko *et al.* (1996) found that fruit size in Panamanian fig species  
329 correlates with the body size of the associated bat species. *Ficus culubrinae* has small fruits and

330 is visited mainly by *E. alba*, at least in the study area. Occasionally another small bat species  
331 (*Mesophylla macconnelli*) can be netted at fruiting trees and rarely also medium-sized bats like  
332 *Plathyrrinus helleri* and *Uroderma bilobatum* (pers.obs, BRH). To our knowledge it has never  
333 been studied how fig trees attract the respective size class of bats that feeds on their fruits.  
334 Similarities in the scent bouquet of equally sized fruits may be a possible signaling strategy. This  
335 may explain the contrasting odor profile of the ‘bat-figs’ investigated in Panama (Hodgkison *et*  
336 *al.* 2013) that are medium- to large-sized and attract much larger bat species than *E. alba* (Kalko  
337 *et al.* 1996). Interestingly, sesquiterpenes, including  $\alpha$ - and  $\beta$ -copaene, dominated the bouquet of  
338 the only small sized Neotropical fig species (*F. costaricana*) in the sample of Hodgkison *et al.*  
339 (2013). Fruit scents of *F. costaricana* were rejected in feeding trials with the large Phyllostomid  
340 bat *A. jamaicensis*, but seeds of this ‘bird-fig’ can occasionally be found in the feces of small bat  
341 species (Kalko *et al.* 1996, Giannini & Kalko 2004). In general, there are only few data available  
342 on volatile composition of fruits that attract small-bodied bats. The sesquiterpenes we detected  
343 (calamenene,  $\alpha$ -copaene and  $\beta$ -selinene) have been identified from the scent of inflorescences of  
344 *Calyptrogyne ghiesbreghtiana* (Knudsen 1999). This palm is visited by bats including small  
345 *Artibeus* species (*watsoni/phaeotis*) (Tschapka 2003), which also feed on small-sized figs (Kalko  
346 *et al.* 1996). This may be a hint for different plant species using similar olfactory cues to attract a  
347 similar disperser spectrum.

348 CONCLUSION—Taking the results from behavioral trials and chemical analyses together, our  
349 study suggests that the ‘bird-fig’ *Ficus colubrinae* attracts nightly dispersers by altered scent  
350 production. Daily variation in the volatile profile of fruits may be more common than previously  
351 thought, but widely overlooked until very recently, since it has now been documented in both the  
352 New and the Old World tropics. Generally, volatile ecology in the genus *Ficus* seems to be  
353 complex and seems to be worth to receive further attention. The description of ‘bat-figs’ as

354 fragrant is just as simplified as calling ‘bird-figs’ odorless. Scent may possibly be a qualitative  
355 adaptation to a certain disperser spectrum. However, to prove the latter hypothesis, a genus-wide  
356 identification of fig scents would be necessary along with multi-species feeding trials across  
357 frugivorous bat families.

358

## 359 **ACKNOWLEDGMENTS**

360

361 We thank Manuel Rojas, Christian Schmid, and Wito Lapinski for their help during field work.  
362 We are grateful to Gabriele Wiest for quantitative analysis of gas chromatograms. Emma Berdan,  
363 Thomas Blankers, and Linus Günther helped to improve this manuscript with well-conceived  
364 comments. Necessary permits were obtained with the valuable assistance of J. Guevara (Permit  
365 number: 128-2011-SINAC). The project was funded by the Deutsche Forschungsgemeinschaft  
366 (DFG, Germany) to EKVK and MA (KA 124 8-1; AY 12/8-2).

367

## 368 **DATA AVAILABILITY STATEMENT**

369 Data will be archived upon article acceptance.

370



371 **References**

- 372 BORGES, R., J. M. BESSIÈRE, AND M. HOSSAERT-MCKEY. 2008. The chemical ecology of seed  
373 dispersal in monoecious and dioecious figs. *Funct. Ecol.* 22: 484-493.
- 374 BORGES, R. M., Y. RANGANATHAN, A. KRISHNAN, M. GHARA, AND G. PRAMANIK. 2011. When  
375 should fig fruit produce volatiles? Pattern in a ripening process. *Acta Oecol.* 37: 611-618.
- 376 BROOKE, A. P. 1990. Tent selection, roosting ecology and social organization of the tent-making  
377 bat, *Ectophylla alba*, in Costa Rica. *J. Zool.* 221: 11-19.
- 378 BURGER, W. 1977. *Flora Costaricensis*. Field Museum of Natural History, Chicago.
- 379 BURNS, K. C., AND J. L. DALEN. 2002. Foliage color contrasts and adaptive fruit color variation in  
380 a bird-dispersed plant community. *Oikos* 96: 463-469.
- 381 CHARLES-DOMINIQUE, P. 1986. Inter-relations between frugivorous vertebrates and pioneer  
382 plants: *Cecropia*, birds and bats in French Guyana. In A. Estrada and T. H. Fleming (Eds.).  
383 *Frugivores and seed dispersal*, pp. 119-135. Junk, W., Dr., Dordrecht.
- 384 FLEMING, T. H., AND W. J. KRESS. 2013. *The ornaments of life: coevolution and conservation in*  
385 *the tropics*. University of Chicago Press.
- 386 GALINDO-GONZÁLEZ, J., S. GUEVARA, AND V. J. SOSA. 2000. Bat- and bird-generated seed rains  
387 at isolated trees in pastures in a tropical rainforest. *Conserv. Biol.* 14: 1693-1703.
- 388 GAUTIER-HION, A., J.-M. DUPLANTIER, R. QURIS, F. FEER, C. SOURD, J.-P. DECOUX, G. DUBOST,  
389 L. EMMONS, C. ERARD, P. HECKETSWEILER, A. MOUNGAZI, C. ROUSSILHON, AND J.-M. THIOLLAY.  
390 1985. Fruit characters as a basis of fruit choice and seed dispersal in a tropical forest vertebrate  
391 community. *Oecologia* 65: 324-337.
- 392 GIANNINI, N. P., AND E. K. V. KALKO. 2004. Trophic structure in a large assemblage of  
393 phyllostomid bats in Panama. *Oikos* 105: 209-220.

- 394 GORCHOV, D. L., F. CORNEJO, C. ASCORRA, AND M. JARAMILLO. 1993. The role of seed dispersal  
395 in the natural regeneration of rain forest after strip-cutting in the Peruvian Amazon. *Vegetatio*  
396 107-108: 339-349.
- 397 GRISON-PIGÉ, L., M. HOSSAERT-MCKEY, J. M. GREEFF, AND J.-M. BESSIÈRE. 2002. Fig volatile  
398 compounds—a first comparative study. *Phytochemistry* 61: 61-71.
- 399 HERRERA, C. M. 2002. Seed dispersal by vertebrates. *In* C. M. Herrera and O. Pellmyr (Eds.).  
400 Plant–animal interactions: an evolutionary approach, pp. 185-208. Blackwell Science Ltd.,  
401 Oxford, UK.
- 402 HODGKISON, R., M. AYASSE, C. HÄBERLEIN, S. SCHULZ, A. ZUBAID, W. A. W. MUSTAPHA, T. H.  
403 KUNZ, AND E. K. V. KALKO. 2013. Fruit bats and bat fruits: the evolution of fruit scent in relation  
404 to the foraging behaviour of bats in the New and Old World tropics. *Funct. Ecol.* 27: 1075-1084.
- 405 HODGKISON, R., M. AYASSE, E. K. V. KALKO, C. HÄBERLEIN, S. SCHULZ, W. A. W. MUSTAPHA,  
406 A. ZUBAID, AND T. H. KUNZ. 2007. Chemical ecology of fruit bat foraging behaviour in relation  
407 to the fruit odors of two species of paleotropical bat-dispersed figs (*Ficus hispida* and *ficus*  
408 *scortechinii*). *J. Chem. Ecol.* 33: 2097-2110.
- 409 HOWE, H. F., AND J. SMALLWOOD. 1982. Ecology of seed dispersal. *Annu. Rev. Ecol. Syst.* 13:  
410 201-228.
- 411 HOWE, H. F., AND L. C. WESTLEY. 1988. *Ecological relationships of plants and animals*. Oxford  
412 University Press, Oxford, UK
- 413 JANSON, C. H. 1983. Adaptations of fruit morphology to dispersal agents in a neotropical forest.  
414 *Science* 219: 187-189.
- 415 KALKO, E. K. V., AND M. AYASSE. 2009. Study and analysis of odor involved in the behavioral  
416 ecology of bats. *In* T. H. Kunz and S. Parsons (Eds.). *Behavioral methods in the study of bats*, pp.  
417 491-499. John Hopkins University Press, Baltimore.

- 418 KALKO, E. K. V., AND M. A. CONDON. 1998. Echolocation, olfaction and fruit display: how bats  
419 find fruit of flagellichorous cucurbits. *Funct. Ecol.* 12: 364-372.
- 420 KALKO, E. K. V., E. A. HERRE, AND C. O. J. HANDLEY. 1996. Relation of fig fruit characteristics  
421 to fruit-eating bats in the New and Old World tropics. *J. Biogeogr.* 23: 565-576.
- 422 KNUDSEN, J. T. 1999. Floral scent chemistry in geonomoid palms (Palmae: Geonomeae) and its  
423 importance in maintaining reproductive isolation. *Mem New York Botan G:* 141-168.
- 424 KORINE, C., AND E. K. KALKO. 2005. Fruit detection and discrimination by small fruit-eating bats  
425 (Phyllostomidae): echolocation call design and olfaction. *Behav. Ecol. Sociobiol.* 59: 12-23.
- 426 KORINE, C., E. K. V. KALKO, AND E. A. HERRE. 2000. Fruit characteristics and factors affecting  
427 fruit removal in Panamanian community of strangler figs. *Oecologia* 123: 560-568.
- 428 LALEL, H. J. D., Z. SINGH, AND S. C. TAN. 2003. Aroma volatiles production during fruit ripening  
429 of 'Kensington Pride' mango. *Postharvest Biol. Technol.* 27: 323-336.
- 430 LI, G. P., H. J. JIA, R. Y. WU, AND Y. W. TENG. 2013. Changes in volatile organic compound  
431 composition during the ripening of 'Nanguoli' pears (*Pyrus ussuriensis* Maxim) harvested at  
432 different growing locations. *J. Horticult. Sci. Biotechnol.* 88: 563-570.
- 433 LOMÁSCOLO, S. B., D. J. LEVEY, R. T. KIMBALL, B. M. BOLKER, AND H. T. ALBORN. 2010.  
434 Dispersers shape fruit diversity in *Ficus* (Moraceae). *Proc. Natl. Acad. Sci. USA* 107: 14668-  
435 14672.
- 436 LOMÁSCOLO, S. B., P. SPERANZA, AND R. T. KIMBALL. 2008. Correlated evolution of fig size and  
437 color supports the dispersal syndromes hypothesis. *Oecologia* 156: 783-796.
- 438 MCLAFFERTY, F., AND D. STAUFFER. 1989. *The Wiley/NBS Registry of Mass Spectral*  
439 *DataWiley*. Wiley Interscience, New York.

- 440 OBENLAND, D., S. COLLIN, J. SIEVERT, F. NEGM, AND M. L. ARPAIA. 2012. Influence of maturity  
441 and ripening on aroma volatiles and flavor in 'Hass' avocado. *Postharvest Biol. Technol.* 71: 41-  
442 50.
- 443 R DEVELOPING CORE TEAM. 2015. R: A language and environment for statistical computing. R  
444 Foundation for Statistical Computing, Vienna, Austria.
- 445 RODRIGUEZ-HERRERA, B., R. A. MEDELLIN, AND M. GAMBA-RIOS. 2008. Roosting requirements  
446 of white tent-making bat *Ectophylla alba* (Chiroptera : Phyllostomidae). *Acta Chiropterol* 10: 89-  
447 95.
- 448 SHANAHAN, M., S. O. SAMSON, S. G. COMPTON, AND R. CORLETT. 2001. Fig-eating by vertebrate  
449 frugivores: A global review. *Biol. Rev. Camb. Philos. Soc.* 76: 529-572.
- 450 THIES, W., E. K. V. KALKO, AND H. U. SCHNITZLER. 1998. The roles of echolocation and olfaction  
451 in two Neotropical fruit-eating bats, *Carollia periscillata* and *C. castanea*, feeding on *Piper*.  
452 *Behav. Ecol. Sociobiol.* 42: 397-409.
- 453 TSCHAPKA, M. 2003. Pollination of the understorey palm *Calyptranthes ghiesbreghtiana* by  
454 hovering and perching bats. *Biol. J. Linn. Soc.* 80: 281-288.
- 455 VAN DER PIJL, L. 1957. The dispersal of plants by bats (chiropterochory). *Acta Bot. Neerl.* 6: 291-  
456 315.
- 457 VAN DER PIJL, L. 1982. van der: Principles of dispersal in higher plants. Springer, Berlin.
- 458 WHEELWRIGHT, N. T. 1985. Fruit-size, gape width, and the diets of fruit-eating birds. *Ecology* 66:  
459 808-818.
- 460 WHEELWRIGHT, N. T., AND C. H. JANSON. 1985. Colors of fruit displays of bird-dispersed plants  
461 in two tropical forests. *Am. Nat.* 126: 777-799.

462 WILLSON, M. F., AND A. TRAVASET. 2000. The ecology of seed dispersal. *In* F. M. (Ed.). Seeds:  
463 The Ecology of Regeneration in Plant Communities, pp. 85-110. CAB International, Wallingford,  
464 UK.

465

466 TABLE 1. Parameters measured during behavioral trials on six individuals of *Ectophylla alba*  
467 that were subjected with fig clay dummies and a bag filled with real figs of *Ficus colubrinae*

| Bat individual | Reaction to<br>clay dummies | Reaction to bag with figs |                                   |                                      |
|----------------|-----------------------------|---------------------------|-----------------------------------|--------------------------------------|
|                |                             | Overall<br>reaction       | Time until first<br>landing [min] | # approaches<br>before first landing |
| 1              | -                           | +                         | 19                                | 1                                    |
| 2              | -                           | +                         | 14                                | 5                                    |
| 3              | -                           | -                         | -                                 | -                                    |
| 4              | -                           | +                         | 48                                | 1                                    |
| 5              | -                           | +                         | 17                                | 1                                    |
| 6              | -                           | +                         | 6                                 | 4                                    |

468

469

470 TABLE 2. Comparison of individual chemical scent compounds of ripe fruits during day and  
 471 during night based on relative amounts; substance were attributed to the following classes: *fapc*  
 472 fatty acid pathway compounds, *st* sesquiterpenes, *ac* aromatic compounds, *uk* unknown

| Compound                                     | substance<br>class | higher<br>during | p      | Mann-<br>Whitney U |
|----------------------------------------------|--------------------|------------------|--------|--------------------|
| 1-dodecanol                                  | fapc               | night            | 0.449  | 307.5              |
| 1-tetradecanol                               | fapc               | night            | 0.105  | 259                |
| secondary alcohol                            | fapc               | day              | 0.052  | 247                |
| nonanal                                      | fapc               | day              | <0.001 | 145                |
| decanal                                      | fapc               | day              | <0.001 | 67                 |
| unidentified substance                       | uk                 | day              | <0.001 | 139.5              |
| $\alpha$ -copaene                            | st                 | night            | 0.845  | 339                |
| $\beta$ -copaene +<br>naphthalene derivative | st + ac            | night            | 0.001  | 164                |
| $\alpha$ -cubebene +<br>1,1'-biphenyl        | st + ac            | night            | 0.022  | 221                |
| sesquiterpene A                              | st                 | night            | 0.006  | 197                |
| $\beta$ -selinene                            | st                 | night            | 0.084  | 253                |
| $\delta$ -cadinene + calamenene              | st                 | night            | 0.643  | 324                |

473

474

475

476 FIGURE 1 Relative amounts of compounds that contribute to the separation of ripe figs during  
477 daytime and night. Asterisks indicate significance based on the following  $\alpha$ -levels: \*  $p < 0.05$ , \*\*  
478  $p < 0.01$ , \*\*\*  $p < 0.001$

479 FIGURE 2 Comparison of scent bouquets produced by unripe fruits at night, ripe fruits at night  
480 and ripe fruits during day based on the composition of their chemical compounds using canonical  
481 discriminant function analysis (DFA)



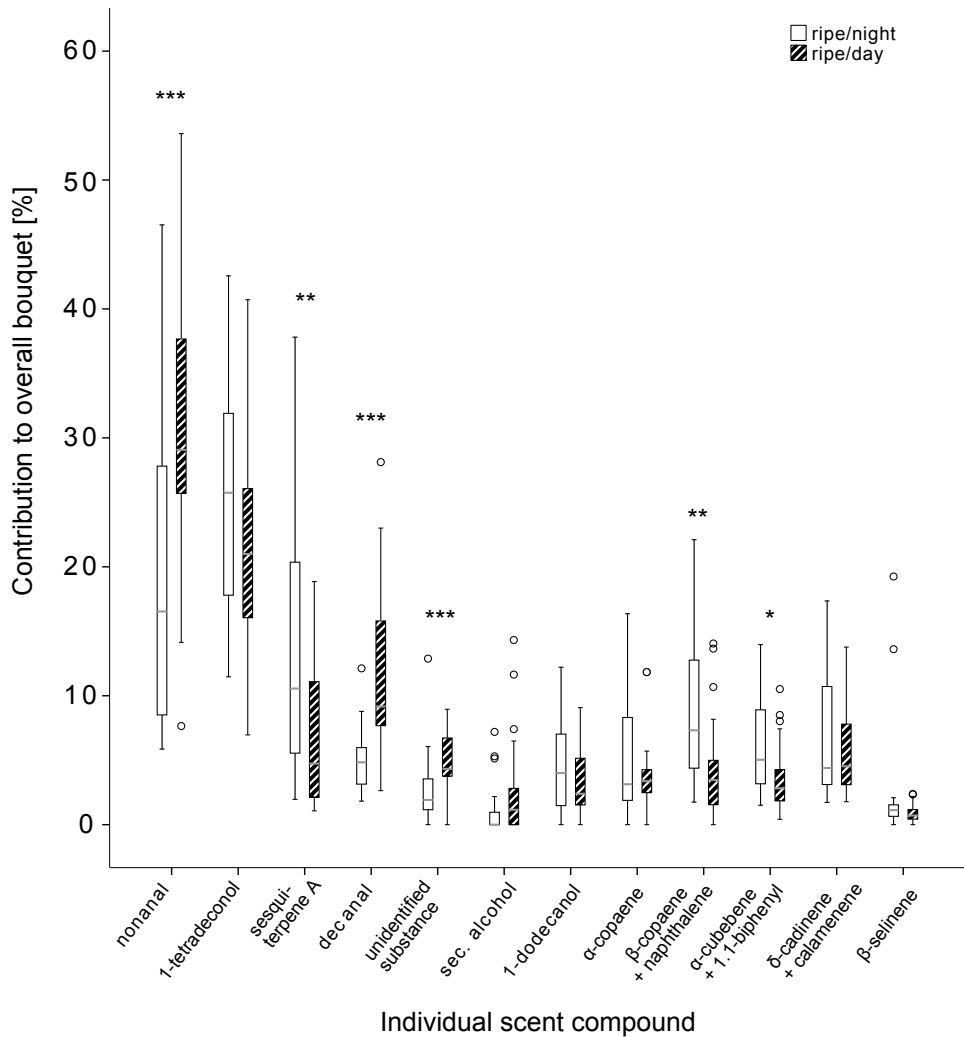

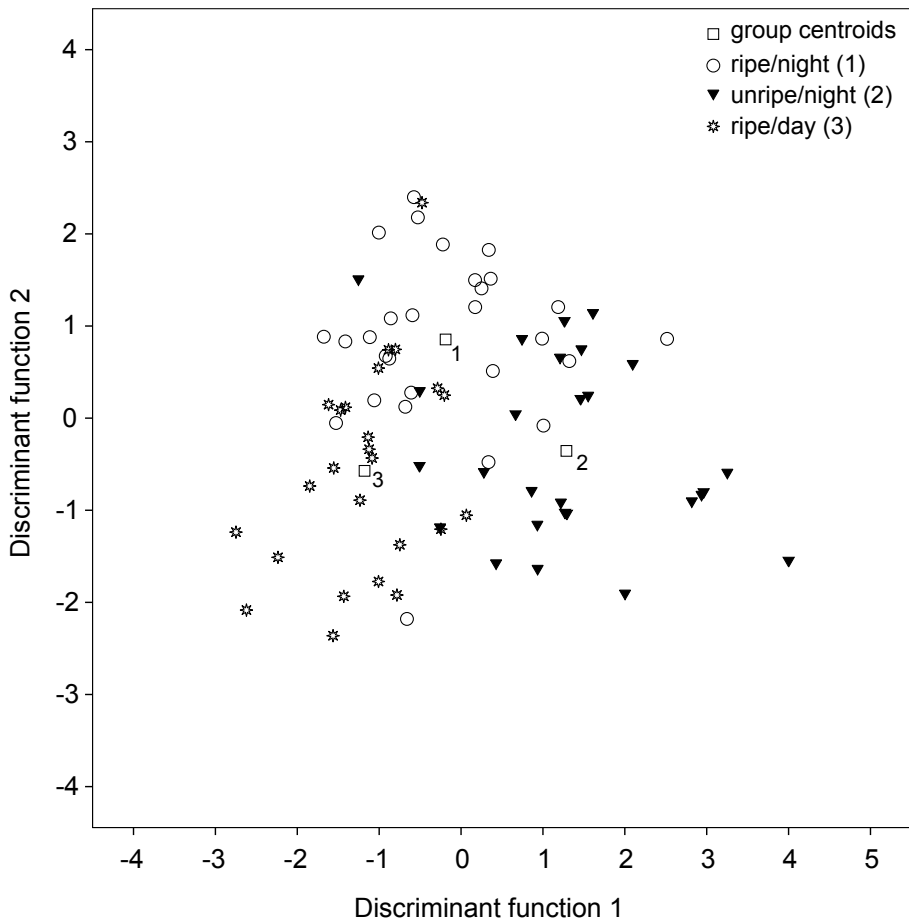

Source: https://www.biorxiv.org/content/10.1101/418970v1.full.pdf
